# Supplementary material for: Survey on Psychological Well-Being and Quality of Life in Visually Impaired Individuals: Dancesport vs. Other Sound Input-Based Sports
Source: MDPI journal article supplement (doi:10.3390/ijerph19084438), 2022-04-07
Supplement: s1 [file s1]

## Questionnaire

First name \_\_\_\_\_

Surname initial letter \_\_\_\_\_

Gender ☐ male ☐ female

Date of birth \_\_\_\_\_

Educational level?

- ☐ No study
- ☐ Primary school
- ☐ Middle school
- ☐ High school
- ☐ University

Your visual impairment is?

- ☐ Congenital
- ☐ Acquired

Your visual impairment classification?

- ☐ Blind
- ☐ Severely sight-impaired
- ☐ Mildly sight-impaired

Are you currently practicing a sport activity?

- ☐ Yes
- ☐ No

If you answered yes, which sport?

- ☐ Futsal
- ☐ Showdown
- ☐ Dancesport
- ☐ Tennis
- ☐ Baseball

How long have you been playing your sport activity?

- ☐ Six months to one year
- ☐ One to three years
- ☐ Over three years

Name of your sport association/team?

\_\_\_\_\_

Have you ever been diagnosed with following diseases?

- ☐ Behavioral/mental disorders
- ☐ Chronic pathologies
- ☐ No disease

## PWB-18 SCALE

Read each question and sign carefully to which extent each statement is proper for you. Using a scale of 1 (strongly disagree) to 6 (strongly agree).

|                                                                                                                               | Strongly disagree<br>1 | 2 | 3 | 4 | 5 | Strongly agree<br>6 |
|-------------------------------------------------------------------------------------------------------------------------------|------------------------|---|---|---|---|---------------------|
| 1. I tend to be influenced by people who have strong personality                                                              |                        |   |   |   |   |                     |
| 2. I have confidence in my own opinions even if they are opposed to those of others                                           |                        |   |   |   |   |                     |
| 3. I judge myself by what I think is important and not by what others think is important                                      |                        |   |   |   |   |                     |
| 4. In general, I feel I am in charge of the situation in which I live                                                         |                        |   |   |   |   |                     |
| 5. The requests of everyday life often bring me down                                                                          |                        |   |   |   |   |                     |
| 6. I am very good at managing the many responsibilities of everyday life                                                      |                        |   |   |   |   |                     |
| 7. I think it is important to have new experiences that help you to compare your opinion of yourself and the world around you |                        |   |   |   |   |                     |
| 8. For me life has been a continuous process of learning, change and growth                                                   |                        |   |   |   |   |                     |
| 9. I gave up trying to make big improvements or changes in my life a long time ago                                            |                        |   |   |   |   |                     |
| 10. For me has been difficult and frustrating to maintain stable relationships                                                |                        |   |   |   |   |                     |
| 11. People would describe me as an available person, ready to share my time with others                                       |                        |   |   |   |   |                     |
| 12. I have not experienced many warm and trusting relationships with others                                                   |                        |   |   |   |   |                     |
| 13. I live life one day at a time and don't really think about the future                                                     |                        |   |   |   |   |                     |
| 14. Some people have no plans, but I am not one of them                                                                       |                        |   |   |   |   |                     |
| 15. Sometimes I have the feeling that I have already done everything that could be done                                       |                        |   |   |   |   |                     |
| 16. I am pleased with how things have turned out in my life                                                                   |                        |   |   |   |   |                     |
| 17. I like most aspects of my personality                                                                                     |                        |   |   |   |   |                     |
| 18. Many times I am not satisfied with the results achieved in my life                                                        |                        |   |   |   |   |                     |

## SF-12

Read each question and sign carefully which statement is proper for you.

**1. In general, would you say your health is?**

Excellent..... 1  
Very Good..... 2  
Good..... 3  
Fair..... 4  
Poor..... 5

**2. Does your health now limit you during moderate physical activities (such as moving a table, pushing a vacuum cleaner, bowling or cycling, etc.)?**

Yes, limited a lot..... 1  
Yes, limited a little..... 2  
No, not limited at all..... 3

**3. Does your health now limit you during climbing a few flights of stairs?**

Yes, limited a lot..... 1  
Yes, limited a little..... 2  
No, not limited at all..... 3

**4. During the past 4 weeks, have you accomplished less than you would like with your work or other regular daily activities as a result of your physical health?**

Yes..... 1  
No..... 2

**5. During the past 4 weeks, did you have to limit certain types of work or other activities as a result of your physical health?**

Yes..... 1  
No ..... 2

**6. During the past 4 weeks, have you accomplished less than you would like with your work or other regular daily activities as a result of any emotional problem (such as feeling depressed or anxious)?**

Yes..... 1  
No ..... 2

**7. During the past 4 weeks, did you have a concentration decline at work or in other activities as a result of any emotional problem (such as feeling depressed or anxious)?**

Yes..... 1  
No..... 2

**8. During the past 4 weeks, how much did pain interfere with your normal work (including both work outside home and housework)?**

Not at all..... 1  
A little bit..... 2  
Moderately..... 3  
Quite a bit ..... 4  
Extremely..... 5

**9. How much of the time during the past 4 weeks, have you felt calm and peaceful?**

All of the time ..... 1  
Most of the time..... 2  
A good bit of the time .....3  
Some of the time..... 4  
A little of the time..... 5  
None of the time ..... 6

**10. How much of the time during the past 4 weeks, have you felt full of energy?**

All of the time ..... 1  
Most of the time..... 2  
A good bit of the time .....3  
Some of the time..... 4  
A little of the time..... 5  
None of the time ..... 6

**11. How much of the time during the past 4 weeks, have you felt downhearted and sad?**

All of the time ..... 1  
Most of the time..... 2  
A good bit of the time .....3  
Some of the time..... 4  
A little of the time... ..... 5  
None of the time ..... 6

**12. During the past 4 weeks, how much of the time has your physical health or emotional status interfered with your social activities (for example with friends, relatives, etc.)?**

All of the time ..... 1  
Most of the time..... 2  
A good bit of the time .....3  
Some of the time..... 4  
A little of the time..... 5  
None of the time ..... 6
